# MIRs are classic, tRNA-derived SINEs that amplified before the mammalian radiation

Arian F. A. Smit\* and Arthur D. Riggs

Department of Biology, Beckman Research Institute of the City of Hope, Duarte, CA 91010, USA

Received September 26, 1994; Revised and Accepted October 25, 1994

## ABSTRACT

Short Interspersed Nucleotide Elements (SINEs) are highly abundant in mammalian genomes. The term SINE has come to be restricted to short retroposons with internal RNA polymerase III promoter sites in a region derived from a structural RNA (usually a tRNA). Here we describe a novel, 260 bp tRNA-derived SINE, some fragments of which have been noted before to be repetitive in mammalian DNA. Unlike previously reported SINEs, which are restricted to closely related species, copies of this element can be found in all mammalian genomes, including marsupials. It is therefore called MIR for mammalian-wide interspersed repeat. Their high divergence and their presence at orthologous sites in different mammals indicate that MIRs, at least in part, amplified before the mammalian radiation. Next to Alu, MIRs are the most common interspersed repeat in primates with an estimated 300 000 copies still discernible, which account for 1 to 2% of our DNA. Interestingly, a small, central region of MIR appears to be much better conserved in the genomic copies than the rest of the sequence.

## INTRODUCTION

SINEs are interspersed repetitive nucleotide elements of 100–300 bp which are found in most vertebrates as well as in invertebrates (1,2). Typical SINEs share a number of common structural features: they contain an internal RNA polymerase III promoter, are flanked by variable length insertion site duplications and usually end in an A- or T-rich tail or a short simple sequence repeat. The internal promoter is in a region apparently derived from a structural RNA and may be essential for the formation of a SINE (3). Most SINEs seem to be fusion products of a tRNA-derived gene and an unrelated sequence (2,4–6).

A wide variety of uncharacterized short interspersed repeats has been catalogued in human DNA (7). In an effort to determine the origin and nature of these sequences we derived full consensus sequences from the genomic copies and found that many of these sequences are fragments of LTR transposons, LINE1 3' ends and putative DNA transposons (8,9, unpublished results).

One of these repetitive sequences is ubiquitous in all placental mammals (10) and therefore has been named MIR for Mam-

malian-wide Interspersed Repeat (7). The repetitive character of MIR was first noted in 1987 (11) and has been rediscovered several times (e.g. 7,12,13). Korotkov (14) believed that this same fragment resembled the mirror image (in purine and pyrimidine sequence) of the rodent B1 repeat, and named it MB1 (Mirror of B1). Elements at orthologous sites in different mammalian species form evidence that the distribution of MIRs took place before the mammalian radiation (10). In the accompanying paper, Jurka *et al.* (15) show that MIRs are even highly repetitive in marsupial and monotreme genomes.

All authors (10,14,15) describe MIRs as about 70 bp long elements without the typical features of 'generic' SINEs, as outlined above. It has, therefore, been suggested that MIRs represent a separate class of repetitive elements (10). Below we will show that this 70 bp MIR element and two other previously reported uncharacterized interspersed repetitive sequences are fragments of a 260 bp, classic tRNA-derived SINE. A second, ancient and abundant short interspersed repeat with limited sequence similarity to MIR, here named MIR2, is presented as well.

## MATERIALS AND METHODS

We screened GenBank, Release 82.0, with the published 70 bp MIR consensus sequence (10), using the IFind program (16) in the IntelliGenetics sequence analysis package. IFind was used with default parameters: word-length 4 (search) or 2 (alignment), gap-penalty 4, window-size 40, density = less. After removal of more recently inserted elements, like Alu, regions containing this sequence were compared in pairs and the consensus sequence was extended in either direction as far as entries showed continued similarity to each other. Using the extended consensus sequence, additional MIR copies were found and added to the alignment, leading to improvement of the consensus. The MIR consensus sequence was optimized by expansion of the data set by successive searches with improved consensus sequences until addition of new copies had no further effect on the consensus.

Searches with the blastn program in the NCBI e-mail server (17) were performed, with default parameters, to obtain information on the conservation of fragments of MIR. For calculation of the number of matches, the cutoff score was set so that only one match is expected to occur at random ( $E = 1$ ,  $P \leq 0.99$ ). Redundant entries were disregarded, but multiple matches in one sequence entry were counted.

\*To whom correspondence should be addressed at: Department of Molecular Biotechnology, University of Washington, FJ-20, Seattle, WA 98195, USA

RESULTS AND DISCUSSION

MIRs are generic SINEs

By aligning over 80 sequences containing MIR similarities, we could construct a MIR consensus of 260 bp (Fig. 1). The consensus may be considered an approximation of the original, transcriptionally active element. It has consensus RNA polymerase A and B boxes and an A/T-rich 3' end, characteristics of a typical SINE (Fig. 2). The third characteristic of (variable length) direct flanking repeats is likely to have become unrecog-

nizable since the MIR fragments are 25–35% diverged from the consensus. The 5' 80 bp of MIR containing the A and B boxes are similar to several tRNAs, and even more so to the tRNA-like region of the rodent B2 SINE (4–6). Like many SINEs, MIR thus resembles a fusion product of a tRNA-derived gene and an unrelated sequence. It is hard to identify the exact, ancestral tRNA of MIR (and most other SINEs), since some tRNA sequences are very similar to one another, while the SINE source genes may have diverged considerably from the parental sequence. The 5' end of the MIR transcript may have retained a tRNA-like

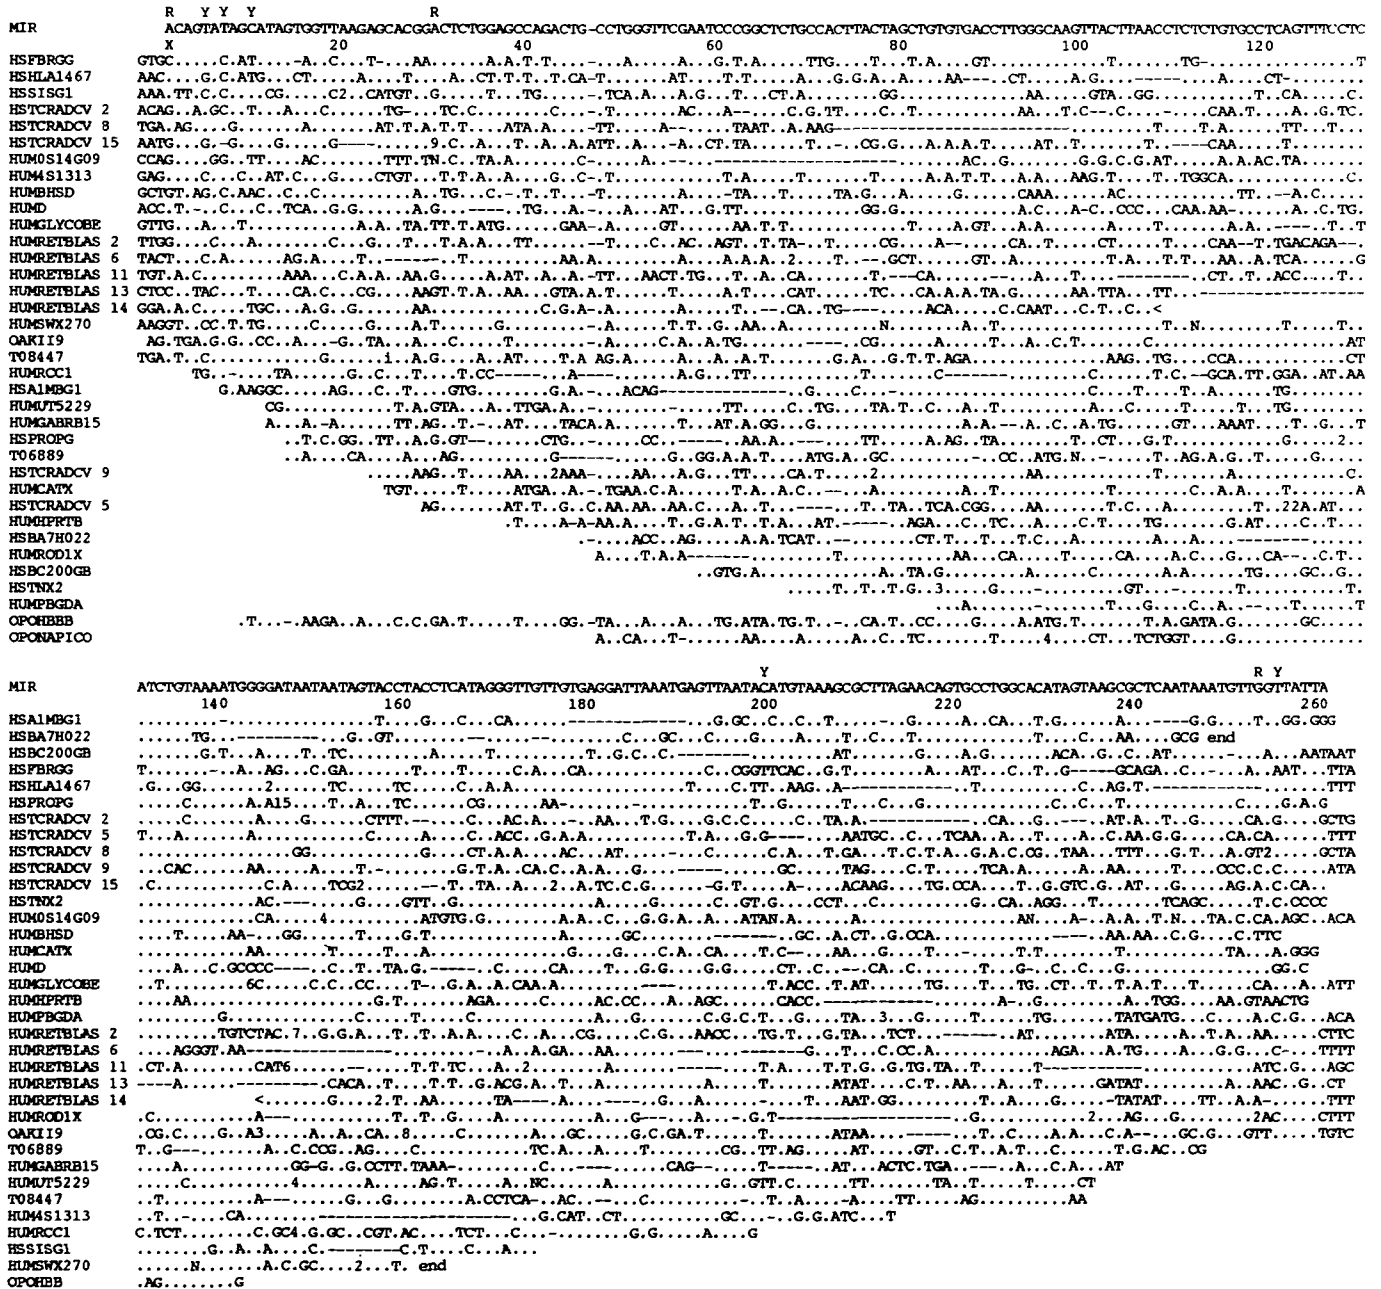

Figure 1. Part of the alignments from which the MIR consensus sequence is derived. A selection of loci (referred to by their GenBank locus names) containing relatively large fragments of MIR is presented in this figure. Ambiguous sites are indicated above the consensus (Y = C/T, R = A/G). Nucleotides that differ from the derived consensus are given as letters. Otherwise, dots denote identical nucleotides, dashes gaps, and numbers insertions of that length. Blank spaces at the beginning and end of entries indicate absence of significant similarity to the consensus.





certainly not abundant before the mammalian radiation. However, MIRs are generic looking SINEs that amplified in large numbers before this time and probably originated even before the split of eutherians and marsupials; fragments of MIRs are found in intron 2 of the opossum  $\beta$ -hemoglobin  $\beta$ -M gene (OPOHBBB 1210–1332) and in the 3' untranslated region of the Na/Pi-cotransporter mRNA (OPONAPICO 2218–2325) (Fig. 1). The abundance of MIR copies in the genome is clear evidence that the formation and efficient retrotransposition of tRNA-derived SINEs is not an evolutionary novelty.

## ACKNOWLEDGEMENTS

This work was supported by NIH grants GM50575, GM46986 and DOE grant DE-FG03-91ER61137 to A. D. Riggs.

## REFERENCES

- 1 Deininger, P.L. and Batzer, M.A. (1993) *Evol. Biol.* **27**, 157–196.
- 2 Okada, N. (1991) *Trends Ecol. Evol.* **6**, 358–361.
- 3 Quentin, Y. (1992) *Nucleic Acids Res.* **20**, 3397–3401.
- 4 Sakamoto, K. and Okada, N. (1985) *J.Mol.Evol.* **2**, 134–140.
- 5 Lawrence, C.B., McDonnell, D.P. and Ramsey, W.J. (1985) *Nucleic Acids Res.* **31**, 4239–4252.
- 6 Daniels, G.R. and Deininger, P.L. (1985) *Nature* **317**, 819–822.
- 7 Jurka, J., Walichiewicz and Milosavljevic, A. (1992). *J. Mol. Evol.* **35**, 286–291
- 8 Smit, A.F.A. (1993). *Nucl. Acids Res.* **21**, 1863–1872.
- 9 Smit, A.F.A., Tóth, G., Riggs, A.D. and Jurka, J. (1994) *J. Mol. Biol.*, in press.
- 10 Donehower, L.A., Slagle, B.L., Wilde, M., Darlington, G. and Butel, J.S. (1989) *Nucleic Acids Res.* **17**, 699–710.
- 11 Degen, S.J. and Davie, E.W. (1987) *Biochemistry* **26**, 6165–6177.
- 12 Zhou, Y.Z., Slagle, B.L., Donehower, L.A., Van Tuinen, P., Ledbetter, D.H. and Butel, J.S. (1988) *J. Virol.* **62**, 4224–4231.
- 13 Bancroft, J.D., Schaefer, L.A. and Degen, S.J.F. (1990) *Gene* **95**, 253–260.
- 14 Korotkov, E.V. (1991) *Mol. Biol. (USSR)* **25**, 250–263.
- 15 Jurka, J., Zietkiewicz, E. and Labuda, D. (1994) *Nucleic Acids Res.* **00**, 000–000.
- 16 Wilbur, W. J. and Lipman, D. J. (1983). *Proc. Natl. Acad. Sci. USA* **80**, 726–730.
- 17 Altschul, S.F., Gish, W., Miller, W., Myers, E.W. and Lipman, D.J. (1990). *J. Mol. Biol.* **215**, 403–410.
- 18 Weiner, A.M., Deininger, P.L. and Efstradiadis, A. (1986) *Annu.Rev.Biochem.* **55**, 631–661.
- 19 Deininger, P.L. and Daniels, G.R. (1986) *Trends Genet.* **2**, 76–80.
- 20 Deininger, P.L. In *Mobile DNA* (eds. Berg, D.E and Howe, M.M.) 619–636 (ASM, Washington, 1989)
- 21 Quentin, Y. (1994) *Nucleic Acids Res.* **22**, 2222–2227.
- 22 Sprinzl, M., Hartmann, T., Weber, J., Blank, J. and Zeidler, R. (1989) *Nucleic Acids Res.* **17**, r1–r155.
